# Supplementary material for: Triggering the electronic microenvironment of extraordinary nitrogen-bridged atomic iron coordinated with in-plane nitrogen by manipulating phase-reconfigured 2D vanadium nitride MXenes toward invigorated lithium–sulfur batteries
Source: Royal Society of Chemistry journal article supplement (doi:10.1039/d4ee02979h), 2024-01-01
Supplement: d4ee02979h1.pdf [file d4ee02979h1.pdf]

## Supporting Information

### Triggering electronic microenvironment of extraordinary nitrogen-bridged atomic iron coordinated with in-plane nitrogen by manipulating phase-reconfigured 2D vanadium nitride MXene toward invigorated lithium-sulfur batteries

Xinlu Zhang,<sup>a,b</sup> Xuexiu Bai,<sup>a</sup> Chuanliang Wei,<sup>b</sup> ZhengRan Wang,<sup>a</sup> Baojuan Xi,<sup>b</sup> Shenglin Xiong,<sup>b</sup> and Jinkui Feng\*<sup>a,b</sup>

<sup>a</sup> Key Laboratory for Liquid-Solid Structural Evolution & Processing of Materials (Ministry of Education), Research Center for Carbon Nanomaterials, School of Materials Science and Engineering, Shandong University, Jinan 250061, P. R. China

<sup>b</sup> Shenzhen Institute of Shandong University, Shenzhen 518057, P. R. China

\* Corresponding author: Jinkui Feng

E-mail address: jinkui@sdu.edu.cn (J. Feng)

### Experimental Section

**Synthesis of Fe<sub>N4</sub>O-NC-VN:** V<sub>2</sub>GaN was added into 1-Butyl-3-methyl-1H-imidazol-3-ium tetrachloroferrate(III) solution that vigorously stirred at room temperature. The above-mentioned mixture were respectively transferred into quartz tubes that were heated to 450 and 550 °C with heating ramp of 2 °C min<sup>-1</sup> for 48 h. After that, achieved black powders cooled down to room temperature were dispersed in the 1 M HCl solution magnetically stirring for 12 h. Subsequently, mixture solution was filtrated and washed using deionized water by vacuum pump. Finally, achieved powders were dried under vacuum oven at 50 °C for overnight, and denoted as V<sub>2</sub>Ga<sub>1-x</sub>N and Fe<sub>N4</sub>O-NC-VN.

**Synthesis of Fe<sub>N4</sub>O-VN:** V<sub>2</sub>GaN powder was mixed and grounded with NaCl, KCl and FeCl<sub>3</sub> for 0.5 h. The mixture was heated to 550 °C with heating ramp of 2 °C min<sup>-1</sup> for 48 h under the mixed gas of NH<sub>3</sub>/argon atmosphere. Afterward, the obtained powder were magnetically stirred in 1 M HCl solution for 12 h. Finally, the above-mentioned mixture solution was filtrated and washed using deionized water by vacuum pump to achieve Fe<sub>N4</sub>O-VN.

**Synthesis of active electrodes:** Active materials of  $V_2Ga_{1-x}N$  or  $Fe_{N4-O-NC-VN}$ , Super P and poly(vinylidene fluoride)(PVDF) with weight ratio of 8:1:1 were grinded by N-methyl pyrrolidinone (NMP) to result in homogeneous slurry coated on Al foil. Subsequently, modified Al foil was dried under vacuum oven at 100 °C for overnight.

**Synthesis of sulfur cathodes:** Sublimed sulfur and Ketjen Black (KB) with mass ratio of 7:3 were grinded and transferred into quartz tubes that were heated to 155 °C for 10 h and continually heated to 185 °C for 2 h with heating ramp of 3 °C min<sup>-1</sup>, denoted as S/KB. The S/KB, Super P and PVDF with weight ratio of 7:2:1 were grinded by NMP as solvent to result in homogeneous slurry coated on Al foil. Finally, the modified Al foil was dried under vacuum oven at 60 °C for overnight. The areal mass loading of sulfur cathode was 1.2-1.5 mg cm<sup>-2</sup>.

**Synthesis of different materials modified separators:** The modified separators were synthesized by blade coating the homogeneous slurry of  $V_2Ga_{1-x}N$  or  $Fe_{N4-O-NC-VN}$ , PVDF and Super P with mass ratio of 8:1:1 on commercial Celgard PP separator. After that, the separators were transferred into vacuum oven heated to 60 °C for overnight. The achieved separators denoted as  $V_2Ga_{1-x}N@PP$  and  $Fe_{N4-O-NC-VN@PP}$ .

**Synthesis of  $Li_2S_6$  electrolyte:** Sublimed sulfur and  $Li_2S$  with molar ratio of 5:1 were added into traditional electrolyte containing 1.0 M LiTFSI in 1,3-dioxolane/dimethyl ether (v/v=1:1) with 1.0 wt.%  $LiNO_3$ ) magnetically stirred until yielding brownish-red  $Li_2S_6$ .

**$Li_2S_6$  visualized adsorption test:** Active materials ( $V_2Ga_{1-x}N$  or  $Fe_{N4-O-NC-VN}$ ) were respectively added into above-synthesized  $Li_2S_6$  solution stood for 12 h. Additionally, blank  $Li_2S_6$  solution was used as comparison.

**$Li_2S_6$  penetration test:** The above-synthesized  $Li_2S_6$  solution and glycol dimethyl ether (DME) solvent with volum ratio of 1:1 were respectively transferred into two sides of H-tube using pristine and modified separators

**Redox kinetic test:** Two identical active electrodes as working and reference/counter electrodes were assembled into symmetric CR2032 coin cells with 0.25 M  $Li_2S_6$  electrolyte in glove box filled Ar. The cyclic voltammetry (CV) tests of symmetric cell operate at potential range of -1.0-1.0 V to assess polysulfide redox kinetics.

**$Li_2S$  nucleation/decomposition:** The above-synthesized active electrodes as cathode and lithium foil as reference/counter electrode were assembled into CR2032 coin cells with 0.25 M  $Li_2S_6$  electrolyte as catholyte and traditional electrolyte without  $Li_2S_6$  as anolyte. For  $Li_2S$  nucleation, assembled cells were galvanostatically discharged to 2.08 V at 0.1 mA and subsequently potentiostatically discharged to 2.06 V for 10000 s. For  $Li_2S$  decomposition

experimental, assembled coin cell were galvanostatically discharged to 1.7 V at 0.1 mA and subsequently potentiostatically charged to 2.35 V for 10000 s.

**Ex situ measurements:** The assembled CR2032 coin cells were charged/discharged to given potentials disassembled in glove box filled with Ar. The obtained electrodes were naturally dried and stood in glove box until to be investigated by PXRD and XPS.

**Material characterization :** The structure and morphology of these materials were respectively investigated by powder X-ray diffraction (PXRD, Rigaku Miniflex 600 X-ray Diffractometer), Raman (Renishaw Raman spectroscopy, Britain) with a 532 nm laser, Field Emission Scanning Electron Microscope (FESEM, JSM-7610F, Japan), Transmission electron microscopy (TEM, JEOL-2100F) and high-resolution transmission electron microscopy (HRTEM, JEOL-2100F), High-angle annular dark-field with spherical aberration-corrected transmission electron microscopy (HAADF-STEM) with Linköping's double Cs corrected FEI-Titan Cubed Themis G2 300 microscope, X-ray photoelectron spectra (XPS, Thermo Scientific K-Alpha), ultraviolet visualized spectra (UV-vis, Shimadzu, Japan), Nitrogen adsorption and desorption isotherm (Micromeritics ASAP2460, USA), Electron spin resonance (EPR, Bruker EMX PLUS), Inductively coupled plasma optical emission spectrometry (ICP-OES, Thermo Fisher iCAP PRO),  $^{57}\text{Fe}$  Mössbauer spectra (ms500), Contact angle test (DSA100), X-ray absorption near-edge spectroscopy (XANES) and extended X-ray absorption fine spectroscopy (EXAFS) (Shanghai Synchrotron Radiation Facility, 200 mA, 3.0 GeV), Contact angles measurement (JY-82C).

**Electrochemical Measurements:** The CR2032 coin cells were assembled by sulfur cathode, lithium anode and different separators using traditional electrolyte of 1.0 M LiTFSI in 1,3-dioxolane/dimethyl ether (V/V=1:1) with 1.0 wt.%  $\text{LiNO}_3$  in glove box filled with Ar. The symmetric cells were assembled by two identical electrodes of lithium foil or active electrode using specified electrolyte and separators in glove box filled with Ar. The CV curves and electrochemical impedance spectra (EIS) were performed on electrochemical workstation (CHI 660E, Chenhua, Shanghai), while electrochemical performances of different cells were investigated on Neware BTS system at different current densities.

**Density Functional Theory:** All preliminary calculations were conducted by utilizing first-principles simulations within the framework of density functional theory (DFT) employing Vienna Ab Initio Package (VASP),<sup>1,2</sup> optimized by Perdew-Burke-Ernzerhof (PBE) functional derived from generalized gradient approximation (GGA) formulation.<sup>3</sup> The interactions of ionic cores and valence electrons were described by projected augmented wave (PAW) potentials by a plane wave basis set with a kinetic energy cutoff of 450 eV.<sup>4, 5</sup> Partial occupancies of

Kohn–Sham orbitals were simulated by using Gaussian smearing method and a width of 0.05 eV. When energy change was smaller than  $10^{-5}$  eV, electronic energy was considered self-consistent, while a geometry optimization was considered convergent when force change was smaller than 0.05 eV/Å. The dispersion interactions were analyzed by Grimme’s DFT-D3 methodology.<sup>6</sup> In term of structural optimizations, gamma point in the Brillouin zone was used for k-point sampling. The free energy of a gas phase molecule or an adsorbate on surface was calculated by equation  $G = E + ZPE - TS$ , where E stands for total energy, ZPE represents zero-point energy, T denotes as temperature in kelvin (298.15 K), and S is entropy. The reported standard hydrogen electrode (SHE) model was employed by the calculations of Gibbs free energy changes ( $\Delta G$ ) of all reaction steps to evaluate the reaction barrier.

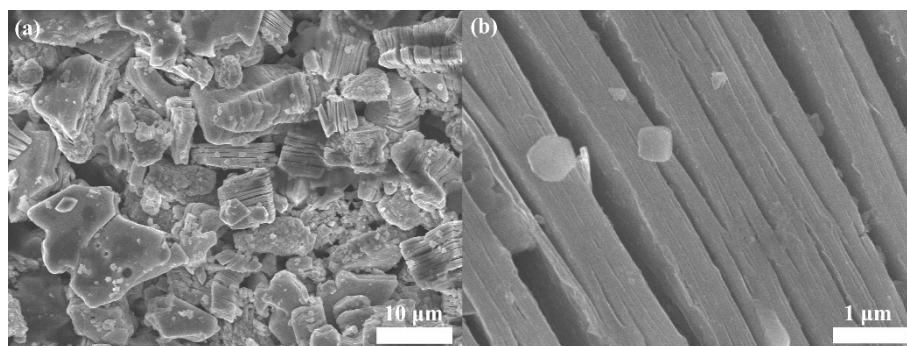

**Fig. S1.** SEM images of  $\text{Fe}_{\text{N}_4\text{-O}}\text{-VN}$ .

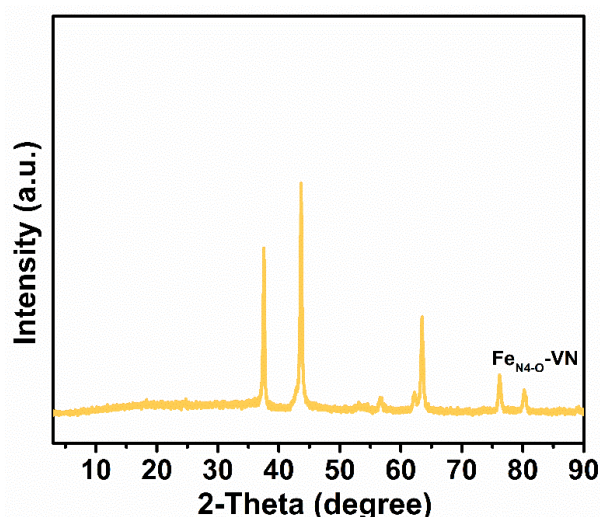

**Fig. S2.** PXRD pattern of  $\text{Fe}_{\text{N}_4\text{-O}}\text{-VN}$ .

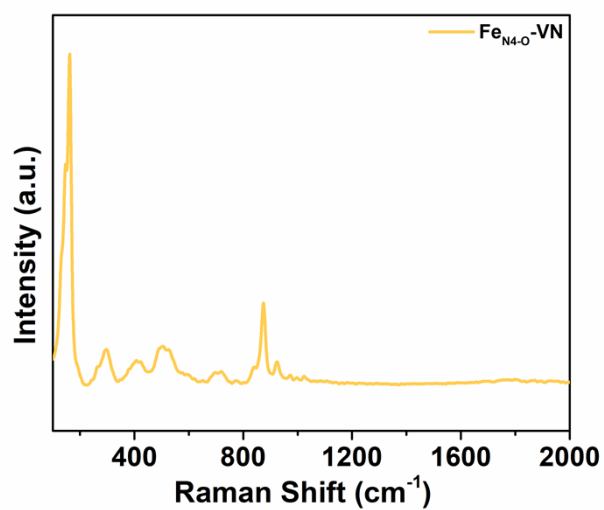

**Fig. S3.** Raman spectrum of Fe<sub>N4-O</sub>-VN.

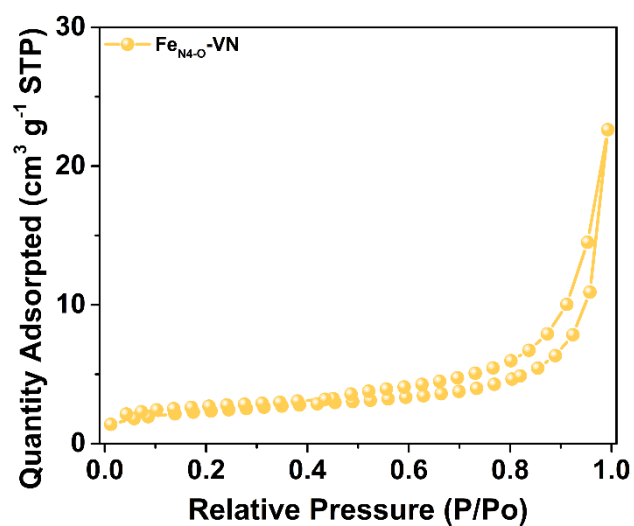

**Fig. S4.** Nitrogen adsorption/desorption isotherm of Fe<sub>N4-O</sub>-VN.

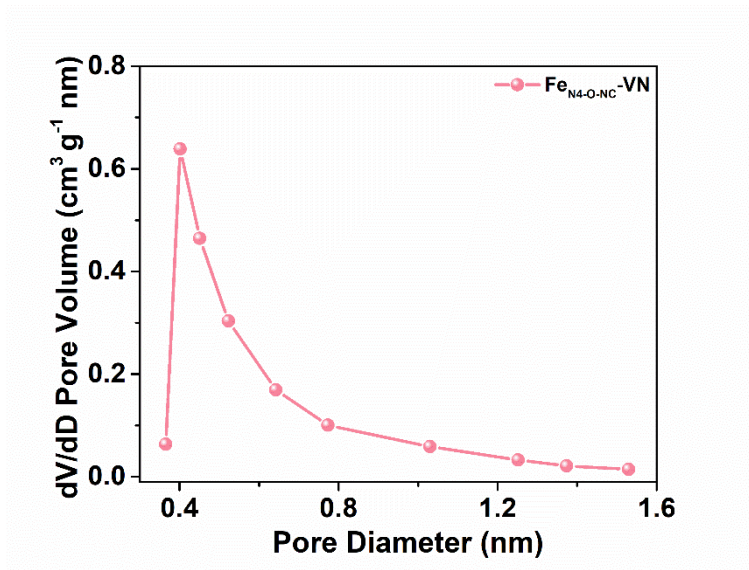

**Fig. S5.** The pore size distributions of  $\text{Fe}_{\text{N4-O-NC-VN}}$  using Horvath-Kawazoe model.

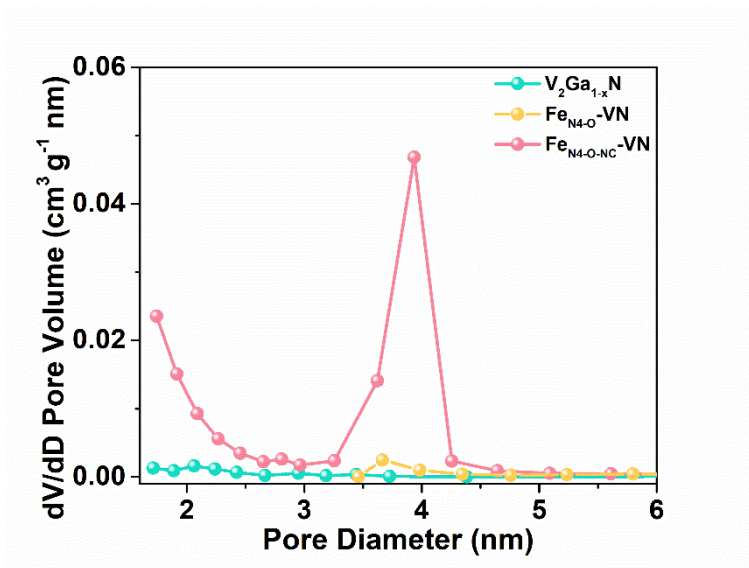

**Fig. S6.** The pore size distributions of  $\text{V}_2\text{Ga}_{1-x}\text{N}$ ,  $\text{Fe}_{\text{N4-O-VN}}$  and  $\text{Fe}_{\text{N4-O-NC-VN}}$  using Barrett-Joiner-Halenda (BJH) model.

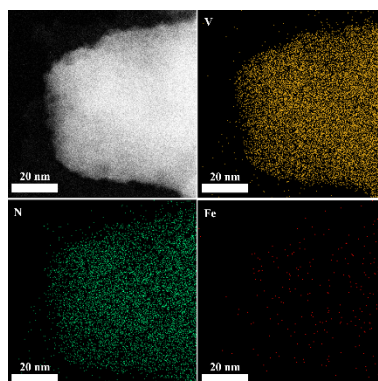

**Fig. S7.** TEM images and EDS mapping of  $\text{Fe}_{\text{N4-O-VN}}$ .

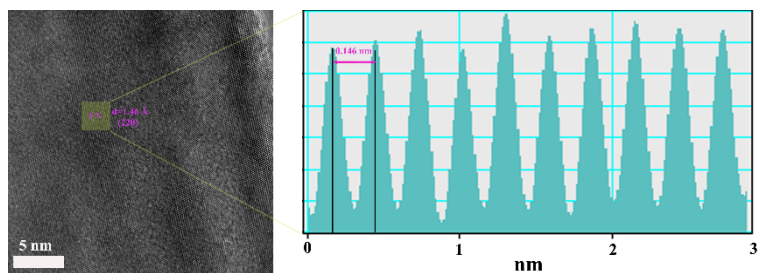

**Fig. S8.** TEM image and lattice distance of  $\text{Fe}_{\text{N}_4\text{-O-VN}}$ .

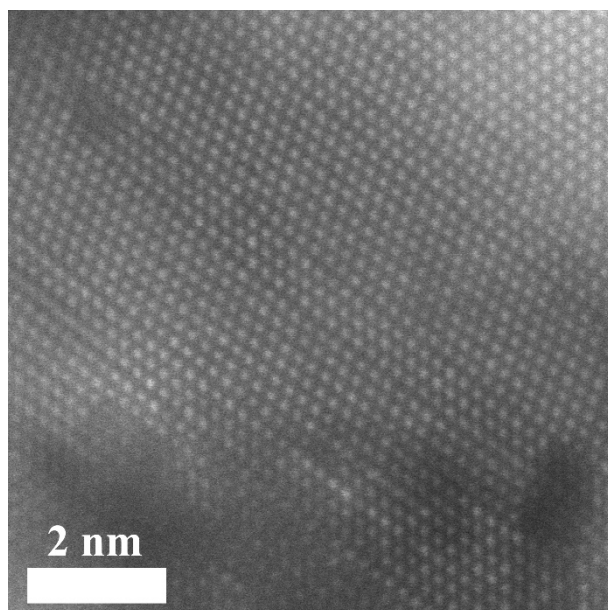

**Fig. S9** HAADF-STEM image of  $\text{Fe}_{\text{N}_4\text{-O-VN}}$ .

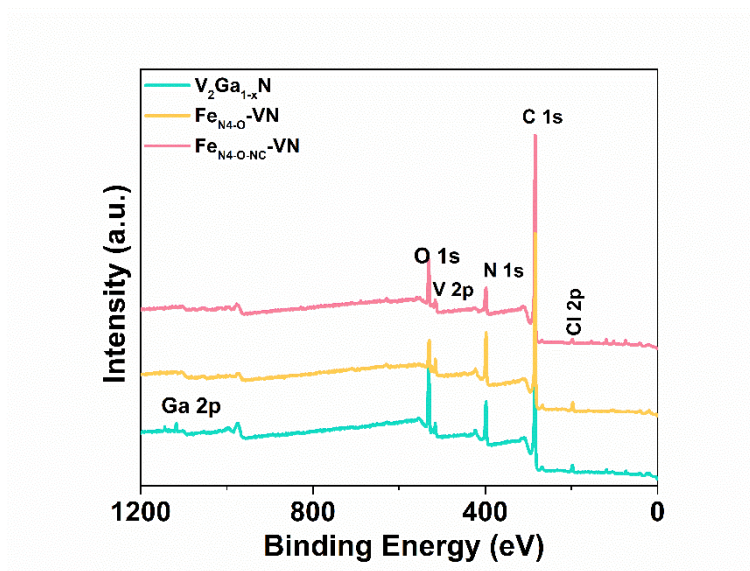

**Fig. S10.** The XPS survey of  $\text{V}_2\text{Ga}_{1-x}\text{N}$ ,  $\text{Fe}_{\text{N}_4\text{-O-VN}}$  and  $\text{Fe}_{\text{N}_4\text{-O-NC-VN}}$ .



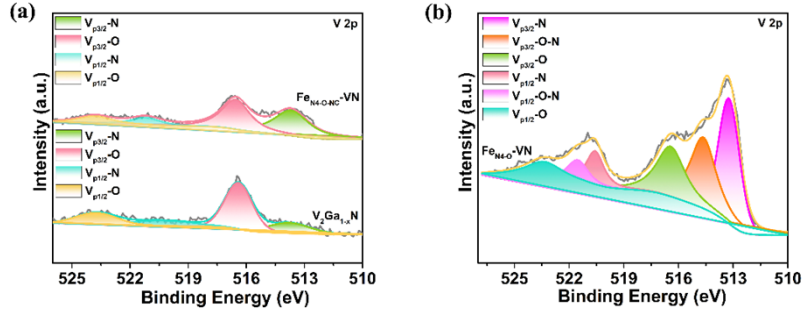

**Fig. S11.** High-resolution XPS spectra of V 2p in  $V_2Ga_{1-x}N$ ,  $Fe_{N4.0-VN}$  and  $Fe_{N4.0-NC-VN}$ .

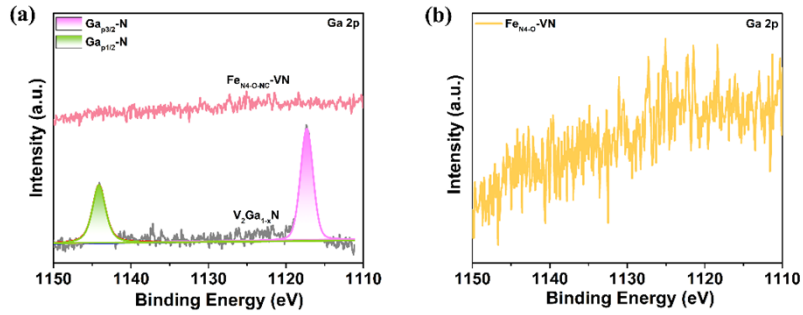

**Fig. S12.** High-resolution XPS spectra of Ga 2p in  $V_2Ga_{1-x}N$ ,  $Fe_{N4.0-VN}$  and  $Fe_{N4.0-NC-VN}$ .

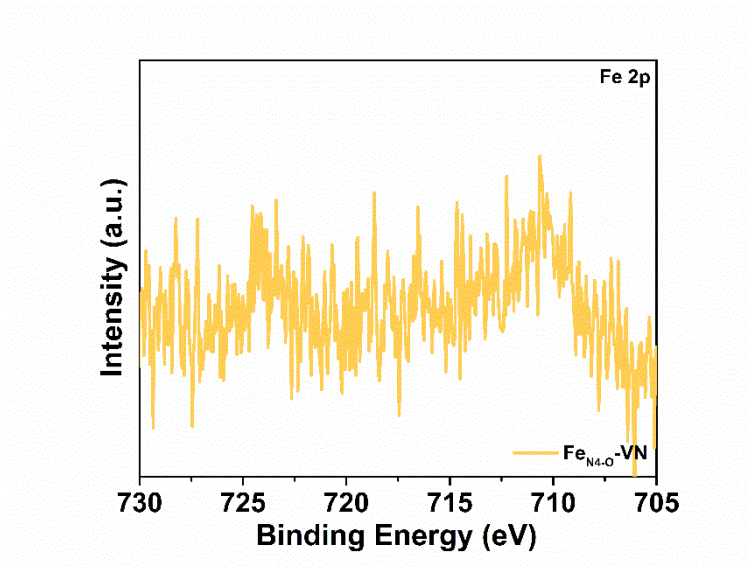

**Fig. S13.** High-resolution XPS spectra of Fe 2p in  $Fe_{N4.0-VN}$ .



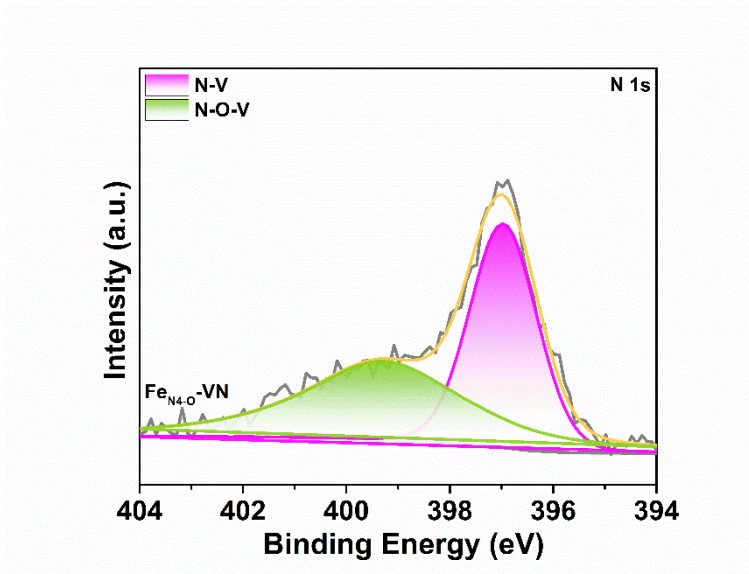

Fig. S14. High-resolution XPS spectra of Fe 2p in  $\text{Fe}_{\text{N}4.0}\text{-VN}$ .

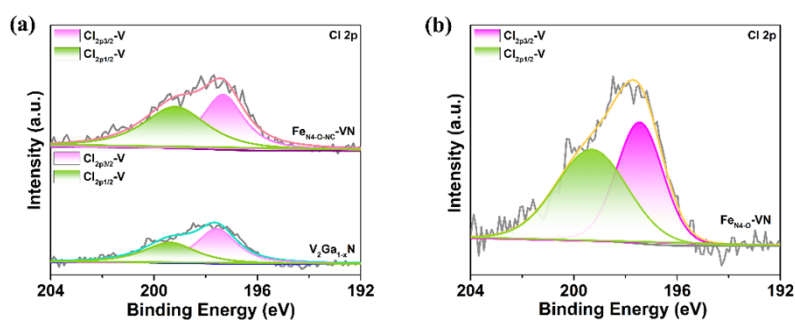

Fig. S15. High-resolution XPS spectra of Cl 2p in  $\text{V}_2\text{Ga}_{1-x}\text{N}$ ,  $\text{Fe}_{\text{N}4.0}\text{-VN}$  and  $\text{Fe}_{\text{N}4.0}\text{-NC-VN}$ .

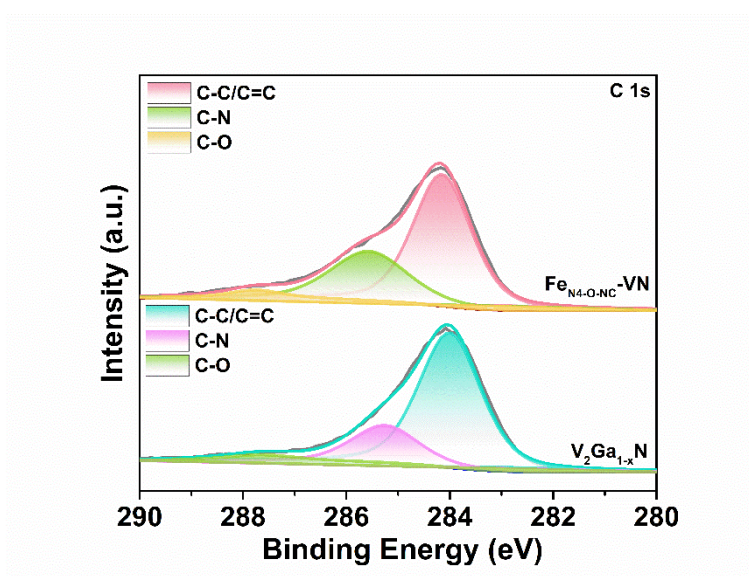

Fig. S16. High-resolution XPS spectra of C 1s in  $\text{V}_2\text{Ga}_{1-x}\text{N}$  and  $\text{Fe}_{\text{N}4.0}\text{-NC-VN}$ .

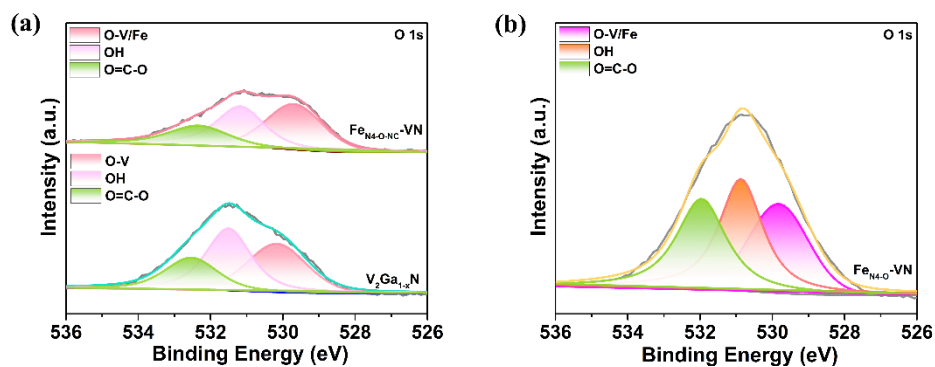

**Fig. S17.** High-resolution XPS spectra of O 1s in  $V_2Ga_{1-x}N$ ,  $Fe_{N4-O-VN}$  and  $Fe_{N4-O-NC-VN}$ .

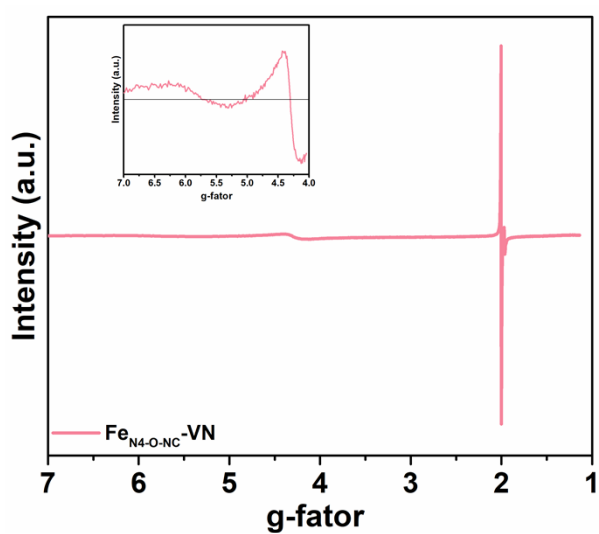

**Fig. S18.** EPR spectrum of  $Fe_{N4-O-NC-VN}$ .

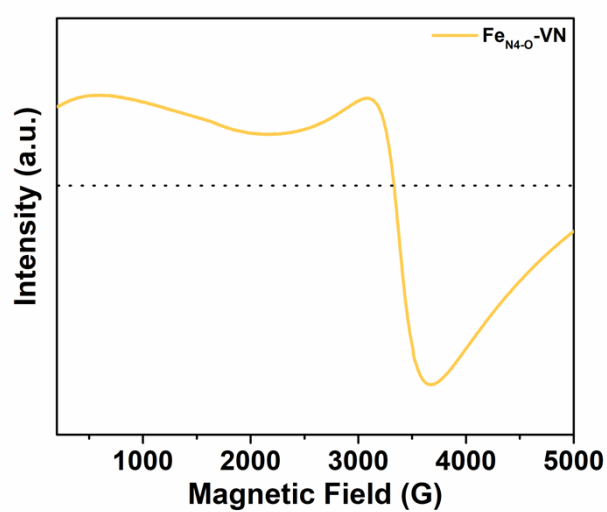

**Fig. S19.** EPR spectrum of  $Fe_{N4-O-VN}$ .

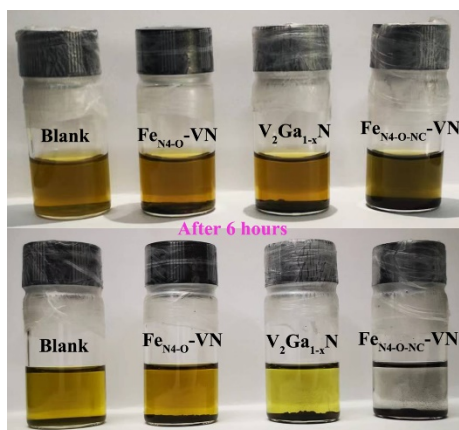

Fig. S20. Photographs of Li<sub>2</sub>S<sub>6</sub> solutions before and after using different materials.

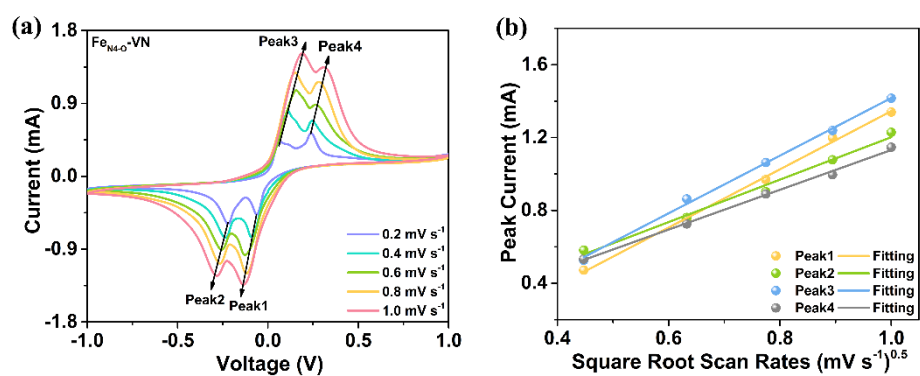

Fig. S21. CV curves of symmetric cells with Fe<sub>N4-O</sub>-VN at 0.2-1.0 mV s<sup>-1</sup>.

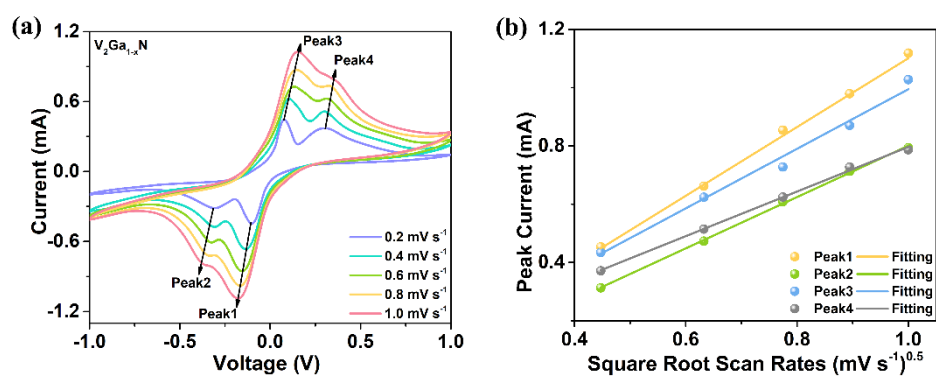

Fig. S22. CV curves of symmetric cells with V<sub>2</sub>Ga<sub>1-x</sub>N at 0.2-1.0 mV s<sup>-1</sup>.

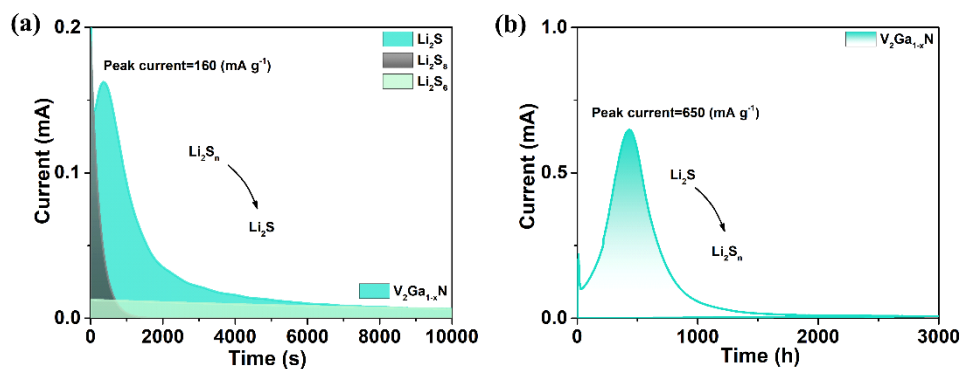

**Fig. S23.** (a) Precipitation and (b) dissolution plots of  $V_2Ga_{1-x}N$ .

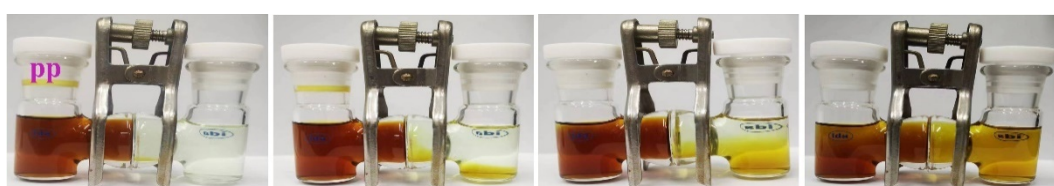

**Fig. S24.** The permeation measurement using pristine separators in  $Li_2S_6$  solution.

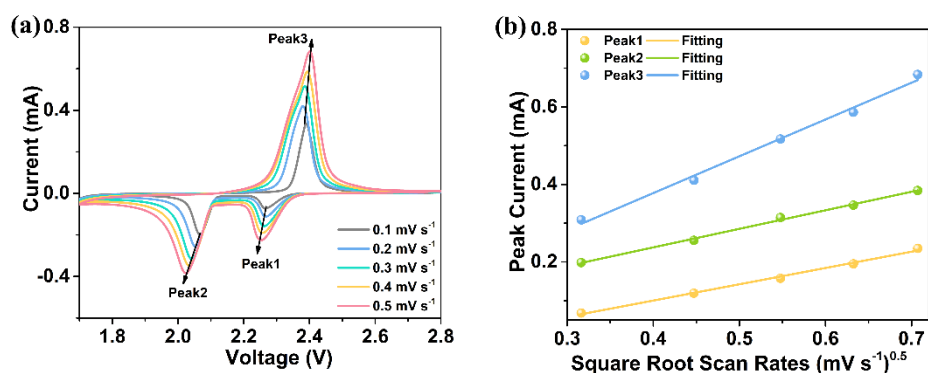

**Fig. S25.** (a) CV curves at  $0.1-0.5 \text{ mV s}^{-1}$ , (b) corresponding linear fitting derived from different peak currents of LSBs with  $Fe_{N4-O}$ -VN modified separator.

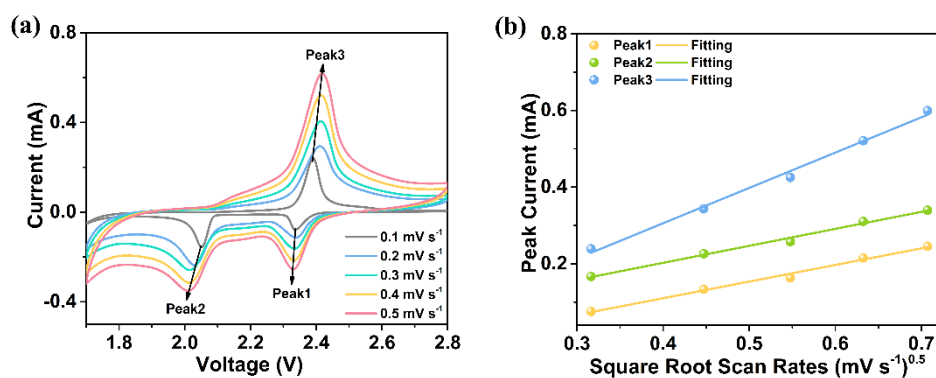

**Fig. S26.** (a) CV curves at 0.1-0.5  $\text{mV s}^{-1}$ , (b) corresponding linear fitting derived from different peak currents of LSBs with  $\text{V}_2\text{Ga}_{1-x}\text{N}$  modified separator.

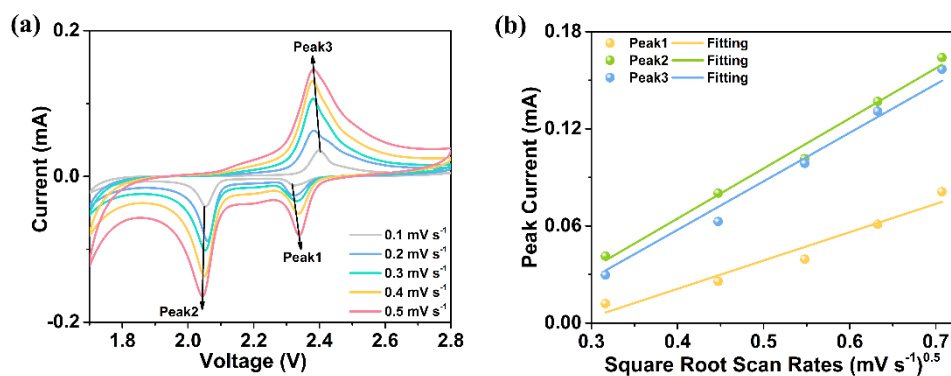

**Fig. S27.** (a) CV curves at 0.1-0.5  $\text{mV s}^{-1}$ , (b) corresponding linear fitting derived from different peak currents of LSBs with pristine separator.

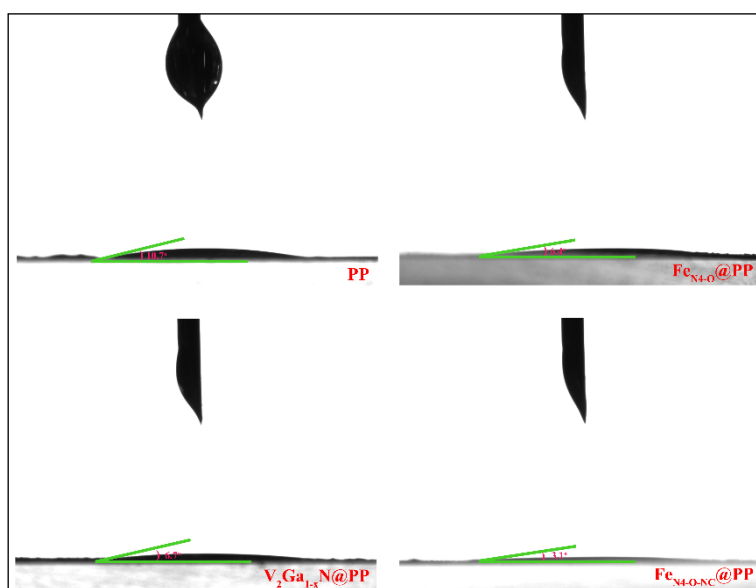

**Fig. S28.** Contact angle measurements of organic electrolyte on different separators.

**Table S1.** The specific surface areas and pore size distributions of  $\text{V}_2\text{Ga}_{1-x}\text{N}$ ,  $\text{Fe}_{\text{N}4-\text{O}}\text{-VN}$  and  $\text{Fe}_{\text{N}4-\text{O}-\text{NC}}\text{-VN}$ .

| Samples                                              | BET   | BJH(HK)  |
|------------------------------------------------------|-------|----------|
| $\text{V}_2\text{Ga}_{1-x}\text{N}$                  | 23.8  | 2.1      |
| $\text{Fe}_{\text{N}4-\text{O}}\text{-VN}$           | 7.9   | 3.7      |
| $\text{Fe}_{\text{N}4-\text{O}-\text{NC}}\text{-VN}$ | 377.8 | 3.9(0.4) |

**Table S2.** The Fe contents determined by ICP-OES for  $V_2Ga_{1-x}N$ ,  $Fe_{N4-O}$ -VN and  $Fe_{N4-O-NC}$ -VN.

| Samples            | Fe (wt.%) |
|--------------------|-----------|
| $V_2Ga_{1-x}N$     | 1.06      |
| $Fe_{N4-O}$ -VN    | 1.141     |
| $Fe_{N4-O-NC}$ -VN | 1.249     |

**Table S3.** The Mössbauer parameters and assignments of  $Fe_{N4-O-NC}$ -VN.

| Component | IS ( $mm\ s^{-1}$ ) | QS ( $mm\ s^{-1}$ ) | $\Gamma$ ( $mm\ s^{-1}$ ) | RA (%) | Assignment            |
|-----------|---------------------|---------------------|---------------------------|--------|-----------------------|
| D1        | 0.26                | 1.39                | 0.78                      | 50.8   | Fe, low spin          |
| D2        | 0.20                | 3.86                | 0.80                      | 38.1   | Fe, intermediate spin |
| D3        | 0.31                | 3.05                | 0.37                      | 11.1   | Fe, high spin         |

**Table S4.** Comparison of electrochemical performances of the previously reported SACs modified separator or as sulfur hosts in lithium-sulfur batteries.

| Samples                             | 0.2 C ( $mAh\ g^{-1}$ )<br>Initial capacity | Rate<br>Capacity<br>( $mAh\ g^{-1}$ ) | Cycling<br>Capacity<br>( $mAh\ g^{-1}$ ) | Cycling<br>Number | Refs. |
|-------------------------------------|---------------------------------------------|---------------------------------------|------------------------------------------|-------------------|-------|
| SA-Fe/ $Fe_2N@NG$                   | 1300 at 0.1 C                               | 905 at 4 C                            | 801.3 at 1 C                             | 500               | 7     |
| Pt SAs/ $In_2S_3/Ti_3C_2$           | 1150                                        | 800 at 4 C                            | 620.8 at 2 C                             | 500               | 8     |
| Ni-NC                               | 1407                                        | 452 at 4 C                            | 497 at 2 C                               | 600               | 9     |
| Co- $O_4$                           | 1138                                        | 478 at 5 C                            | 510 at 1 C                               | 600               | 10    |
| BNNs@CNFs                           | 1244 at 0.1 C                               | 450 at 5 C                            | 460 at 1 C                               | 800               | 11    |
| W/NG                                | 1300                                        | 900 at 5 C                            | 605 at 2 C                               | 1000              | 12    |
| Cu SA/N- $Ti_3C_2T_x$               | 1468                                        | 925 at 3 C                            | 801 at 2 C                               | 400               | 13    |
| Fe/Co-N-HPC                         | 1456 at 0.1 C                               | 774 at 4 C                            | 694 at 1 C                               | 600               | 14    |
| SAFe@g- $C_3N_4$                    | 1379 at 0.1 C                               | 704 at 5 C                            | 624 at 2 C                               | 1000              | 15    |
| N-CoSe <sub>2</sub>                 | 1341                                        | 870 at 5 C                            | 760 at 2 C                               | 500               | 16    |
| SA-Zn-MXene                         | 1136                                        | 517 at 6 C                            | 510 at 4 C                               | 400               | 17    |
| SAV@NG                              | 1230                                        | 430 at 2 C                            | 551 at 0.5 C                             | 400               | 18    |
| Ni-N <sub>5</sub> /HNPC             | 1188                                        | 686 at 4 C                            | 798 at 0.5 C                             | 500               | 19    |
| 3DFeSA-CN                           | 1363                                        | 783 at 3 C                            | 450 at 1 C                               | 1000              | 20    |
| Fe-N <sub>3</sub> C <sub>2</sub> -C | Nearly 1200                                 | 727.8 at 6 C                          | 470 at 2 C                               | 1000              | 21    |



|                           |        |              |              |      |           |
|---------------------------|--------|--------------|--------------|------|-----------|
| Co/MoN                    | 1570   | 860.6 at 1 C | 554 at 1 C   | 500  | 22        |
| D-MOF-Cu                  | 1291.7 | 716.1 at 5 C | 800 at 1 C   | 1000 | 23        |
| Ni-Fe-NC                  | 1250   | 580 at 4 C   | 700 at 1 C   | 600  | 24        |
| Fe <sub>N4-O-NC</sub> -VN | 1615.7 | 803.7 at 5 C | 857.5 at 2 C | 500  | This work |

**Table S5.** The free energy of lithium polysulfides on VN, Fe<sub>N4-O</sub>-VN and Fe<sub>N4-O-NC</sub>-VN.

| Samples                   | S <sub>8</sub> | Li <sub>2</sub> S <sub>8</sub> | Li <sub>2</sub> S <sub>6</sub> | Li <sub>2</sub> S <sub>4</sub> | Li <sub>2</sub> S <sub>2</sub> | Li <sub>2</sub> S |
|---------------------------|----------------|--------------------------------|--------------------------------|--------------------------------|--------------------------------|-------------------|
| VN                        | 0              | -1.91855                       | -1.71781                       | -1.654                         | -1.3901                        | -0.49536          |
| Fe <sub>N4-O</sub> -VN    | 0              | -2.21356                       | -1.95268                       | -1.83035                       | -1.66461                       | -0.85113          |
| Fe <sub>N4-O-NC</sub> -VN | 0              | -2.44022                       | -2.28708                       | -2.24515                       | -2.02401                       | -1.37692          |

**Table S6.** The adsorption energy of lithium polysulfides on VN, Fe<sub>N4-O</sub>-VN and Fe<sub>N4-O-NC</sub>-VN.

| Samples                   | S <sub>8</sub> | Li <sub>2</sub> S <sub>8</sub> | Li <sub>2</sub> S <sub>6</sub> | Li <sub>2</sub> S <sub>4</sub> | Li <sub>2</sub> S <sub>2</sub> | Li <sub>2</sub> S |
|---------------------------|----------------|--------------------------------|--------------------------------|--------------------------------|--------------------------------|-------------------|
| VN                        | -1.942         | -2.004                         | -2.219                         | -2.383                         | 2.846                          | 2.557             |
| Fe <sub>N4-O</sub> -VN    | -2.131         | -2.422                         | -2.567                         | -2.919                         | -3.136                         | -2.772            |
| Fe <sub>N4-O-NC</sub> -VN | -2.393         | -2.621                         | -2.947                         | -3.512                         | -3.797                         | -2.946            |

## References

1. G. Kresse and J. Furthmüller, *Comp. Mater. Sci.*, 1996, **6**, 15-50.
2. G. Kresse and J. Furthmüller, *Phys. Rev. B*, 1996, **54**, 11169-11186.
3. J. P. Perdew, K. Burke and M. Ernzerhof, *Phys. Rev. Lett.*, 1996, **77**, 3865-3868.
4. G. Kresse and D. Joubert, *Phys. Rev. B*, 1999, **59**, 1758-1775.
5. P. E. Blöchl, *Phys. Rev. B*, 1994, **50**, 17953-17979.
6. V. Wang, N. Xu, J.-C. Liu, G. Tang and W.-T. Geng, *Comput. Phys. Commun.*, 2021, **267**, 108033.
7. C. Ma, Y. Zhang, Y. Feng, N. Wang, L. Zhou, C. Liang, L. Chen, Y. Lai, X. Ji, C. Yan and W. Wei, *Adv. Mater.*, 2021, **33**, 2100171.
8. C. Zhou, M. Li, N. Hu, J. Yang, H. Li, J. Yan, P. Lei, Y. Zhuang and S. Guo, *Adv. Funct. Mater.*, 2022, **32**, 2204635.
9. R. Wang, J. Qin, F. Pei, Z. Li, P. Xiao, Y. Huang, L. Yuan and D. Wang, *Adv. Funct. Mater.*, 2023, **33**, 2305991.
10. Y. Li, S. Lin, D. Wang, T. Gao, J. Song, P. Zhou, Z. Xu, Z. Yang, N. Xiao and S. Guo, *Adv. Mater.*, 2020, **32**, 1906722.
11. Y. Li, T. Gao, D. Ni, Y. Zhou, M. Yousaf, Z. Guo, J. Zhou, P. Zhou, Q. Wang and S. Guo, *Adv. Mater.*, 2021, **34**, 2107638.
12. B. X. Peng Wang, Zhengchunyu Zhang, Man Huang, Jinkui Feng, and Shenglin Xiong, *Angew. Chem. Int. Ed.*, 2021, **60**, 15563-15571.

13. H. Gu, W. Yue, J. Hu, X. Niu, H. Tang, F. Qin, Y. Li, Q. Yan, X. Liu, W. Xu, Z. Sun, Q. Liu, W. Yan, L. Zheng, Y. Wang, H. Wang, X. Li, L. Zhang, G. Xia and W. Chen, *Adv. Energy Mater.*, 2023, **13**, 2204014.
14. L. Ma, J. Qian, Y. Li, Y. Cheng, S. Wang, Z. Wang, C. Peng, K. Wu, J. Xu, I. Manke, C. Yang, P. Adelhelm and R. Chen, *Adv. Funct. Mater.*, 2022, **32**, 2208666.
15. C. Lu, Y. Chen, Y. Yang and X. Chen, *Nano Lett.*, 2020, **20**, 5522-5530.
16. M. Wang, L. Fan, X. Sun, B. Guan, B. Jiang, X. Wu, D. Tian, K. Sun, Y. Qiu, X. Yin, Y. Zhang and N. Zhang, *ACS Energy Lett.*, 2020, **5**, 3041-3050.
17. D. Zhang, S. Wang, R. Hu, J. Gu, Y. Cui, B. Li, W. Chen, C. Liu, J. Shang and S. Yang, *Adv. Funct. Mater.*, 2020, **30**, 2002471.
18. G. Zhou, S. Zhao, T. Wang, S. Z. Yang, B. Johannessen, H. Chen, C. Liu, Y. Ye, Y. Wu, Y. Peng, C. Liu, S. P. Jiang, Q. Zhang and Y. Cui, *Nano Lett.*, 2020, **20**, 1252-1261.
19. S. Zhang, X. Ao, J. Huang, B. Wei, Y. Zhai, D. Zhai, W. Deng, C. Su, D. Wang and Y. Li, *Nano Lett.*, 2021, **21**, 9691-9698.
20. Y. Ding, Q. Cheng, J. Wu, T. Yan, Z. Shi, M. Wang, D. Yang, P. Wang, L. Zhang and J. Sun, *Adv. Mater.*, 2022, **34**, 2202256.
21. G. Liu, W. Wang, P. Zeng, C. Yuan, L. Wang, H. Li, H. Zhang, X. Sun, K. Dai, J. Mao, X. Li and L. Zhang, *Nano Lett.*, 2022, **22**, 6366-6374.
22. Y. Kong, L. Wang, M. Mamoor, B. Wang, G. Qu, Z. Jing, Y. Pang, F. Wang, X. Yang, D. Wang and L. Xu, *Adv. Mater.*, 2023, 2310143.
23. Y. Xiao, S. Guo, Y. Xiang, D. Li, C. Zheng, Y. Ouyang, A. Cherevan, L. Gan, D. Eder, Q. Zhang and S. Huang, *ACS Energy Lett.*, 2023, **8**, 5107-5115.
24. J. L. Yang, P. Yang, D. Q. Cai, Z. Wang and H. J. Fan, *Nano Lett.*, 2023, **23**, 4000-4007.
